# Supplementary material for: A Roadmap to Large-Scale Multi-Country Replications in Psychology
Source: Oxford University Press journal article supplement (doi:10.1525/collabra.57538), 2022-01-01
Supplement: collabra_2022_8_1_57538_123030.docx [file collabra_2022_8_1_57538_123030.docx]

**Appendix 1.**

**A (brief) reading list**

In Table S1, we provide a list of resources that contain further insights on different aspects of conducting replications in multiple countries that can provide further guidance. We will continue to update the OSF repository accompanying this paper with more supporting materials.

*Table S1.* Suggested readings for multi-country replications.

| **Title** | **Author (Year)** | **Description** |
| --- | --- | --- |
| Advancing methods for psychological assessment across borders | Ruggeri et al. (2019) | Editorial providing advice to early-career researchers in psychology on conducting cross-country studies |
| Team science: A qualitative study of benefits, challenges, and lessons learned | DeHart (2017) | Interviews with nine scientists on lessons learned from working in interdisciplinary teams |
| The Benefits, Barriers, and Risks of Big Team Science | Forscher et al. (2020) | Preprint with general insights from working with large, international research collaborations (Big Team Science) |
| Collaborative Replications and Education Project (CREP) | Grahe et al. (2013) | Online repository with resources for training, support, and professional growth opportunities for students and instructors completing replication projects |
| Evaluating the practical relevance and significance of observed effect sizes in psycho- logical research | Anvari et al. (2021) | Preprint discussing practical relevance and statistical significance of effect sizes |
| [Scientific utopia III: Crowdsourcing science](about:blank) | Uhlmann et al. (2019*)* | Summarises the potential benefits and challenges of large-scale collaborations*.* |
| A Collaborative Approach to Infant Research: Promoting Reproducibility, Best Practices, and Theory-Building | Frank et al. (2017) | Explains an approach to multi-lab replication efforts in research on infants (ManyBabies) |
